# Supplementary material
Source: PubMed Central journal article supplement (PMC6481672)
Supplement: NIHMS1514961-supplement-Supplemental_Table_1.pdf [file NIHMS1514961-supplement-Supplemental_Table_1.pdf]

## Supplemental Material

**Supplemental Table 1. Predictive Value of the CHA<sub>2</sub>DS<sub>2</sub>VASc score for 5-year Ischemic Stroke Risk**

| Group                                             | n    | Stroke* | C-Statistic†        |
|---------------------------------------------------|------|---------|---------------------|
| Any abnormal p-wave index‡+no atrial fibrillation | 4345 | 69      | 0.682 (0.617-0.748) |
| Atrial fibrillation                               | 2229 | 105     | 0.636 (0.577-0.695) |

\*Number of ischemic strokes in 5 years

†C-statistic of CHA<sub>2</sub>DS<sub>2</sub>-VASc score for ischemic stroke

‡Advanced inter-atrial block, prolonged P-wave duration, abnormal P-wave axis, abnormal P-wave terminal force in V1
